# Supplementary material
Source: MDPI journal article supplement (https://www.mdpi.com/2073-4433/12/5/534)
Supplement: s1 [file s1]

# Supplementary Materials: Characterization of Products from the Aqueous-Phase Photochemical Oxidation of Benzene-Diols *Atmosphere* 2021, 12

Yang Ou, Dongyang Nie, Hui Chen, Zhaolian Ye and Xinlei Ge

**Table S1.** Summary of experimental conditions and relevant analyses.

| Precursor                                    | Oxidant <sup>a</sup> | SP-AMS <sup>b</sup> | HPLC <sup>c</sup> | UV-Vis <sup>d</sup> | TOC <sup>e</sup> | DTT <sup>f</sup> |
|----------------------------------------------|----------------------|---------------------|-------------------|---------------------|------------------|------------------|
| <b>RES</b>                                   | ·OH                  | √                   | √                 | √                   | √                | √                |
| C <sub>6</sub> H <sub>6</sub> O <sub>2</sub> | <sup>3</sup> C*      | √                   | √                 | √                   | √                | √                |
| MW:110.11                                    | /                    |                     | √                 | √                   | √                | √                |
| <b>HQ</b>                                    | ·OH                  | √                   | √                 | √                   | √                | √                |
| C <sub>6</sub> H <sub>6</sub> O <sub>2</sub> | <sup>3</sup> C*      | √                   | √                 | √                   | √                | √                |
| MW:110.11                                    | /                    |                     | √                 | √                   | √                | √                |
| <b>MHQ</b>                                   | ·OH                  | √                   | √                 | √                   | √                | √                |
| C <sub>7</sub> H <sub>8</sub> O <sub>3</sub> | <sup>3</sup> C*      | √                   | √                 | √                   | √                | √                |
| MW:140.14                                    | /                    |                     | √                 | √                   | √                | √                |

<sup>a</sup> There are three types of oxidants: ·OH from photolysis of H<sub>2</sub>O<sub>2</sub>, <sup>3</sup>C\* from photolysis of 3,4-DMB and ‘/’ means no oxidant; <sup>b</sup> Only experiments contains ammonium sulfate (i.e. in ·OH and <sup>3</sup>C\* oxidation group) are measured by SP-AMS; <sup>c</sup> HPLC with UV-vis detector for kinetic study; <sup>d</sup> UV-Vis and <sup>e</sup> TOC are used to examine the light absorption of aqueous-phase products; <sup>f</sup> DTT assay for oxidative potential analysis.

**Table S2.** Summary of the kinetic parameters of the benzene-diols precursors.

| Precursor | oxidant         | t <sub>1/2</sub> (min) <sup>a</sup> | Rate constant k <sub>d</sub> (h <sup>-1</sup> ) <sup>b</sup> |
|-----------|-----------------|-------------------------------------|--------------------------------------------------------------|
| RES       | ·OH             | 763                                 | 0.067                                                        |
|           | <sup>3</sup> C* | 1697                                | 0.023                                                        |
|           | /               | 1825                                | 0.022                                                        |
| HQ        | ·OH             | 967                                 | 0.050                                                        |
|           | <sup>3</sup> C* | 1384                                | 0.033                                                        |
|           | /               | 1208                                | 0.035                                                        |
| MHQ       | ·OH             | 154                                 | 0.26                                                         |
|           | <sup>3</sup> C* | 159                                 | 0.24                                                         |
|           | /               | 197                                 | 0.23                                                         |

<sup>a</sup> t<sub>1/2</sub> means the time when approximately half of the precursor was consumed; <sup>b</sup> rate constant for precursor loss determined by Eq.1.

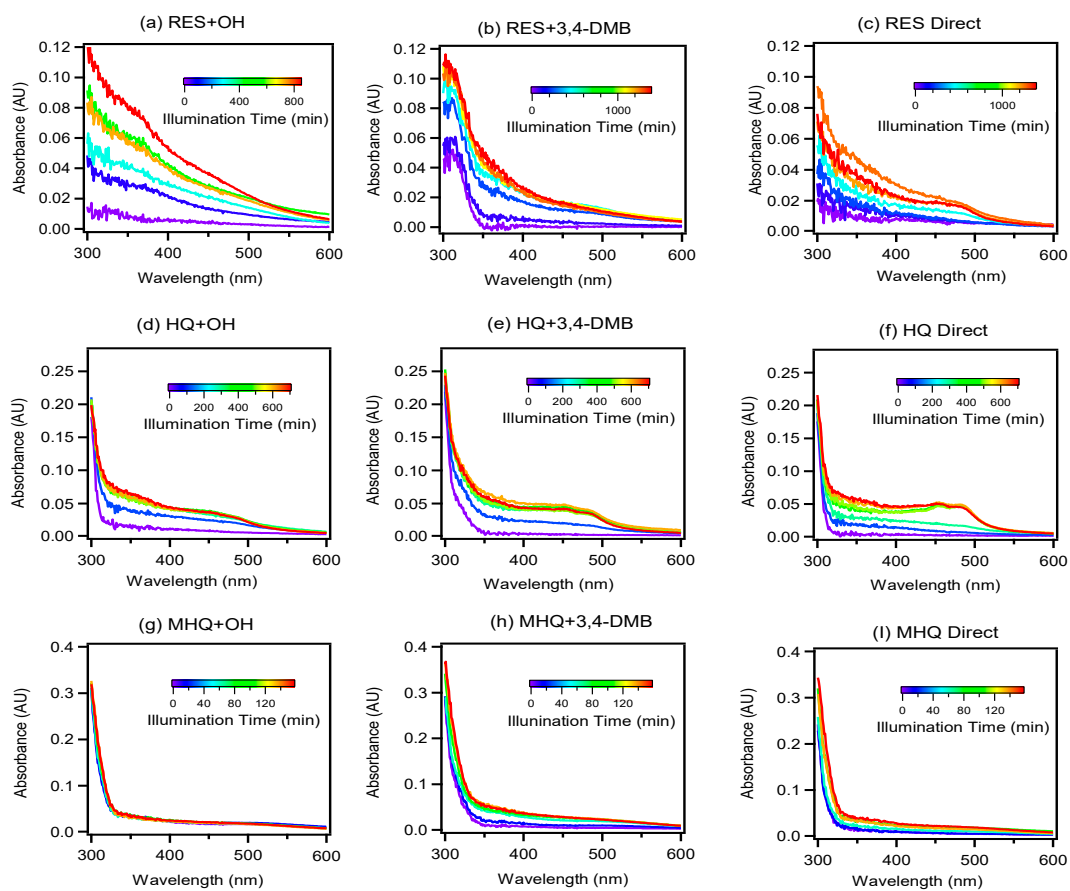

**Figure S1.** Time-dependent UV-Vis light absorption spectra of the reacted solutions obtained at different times during the oxidation experiments

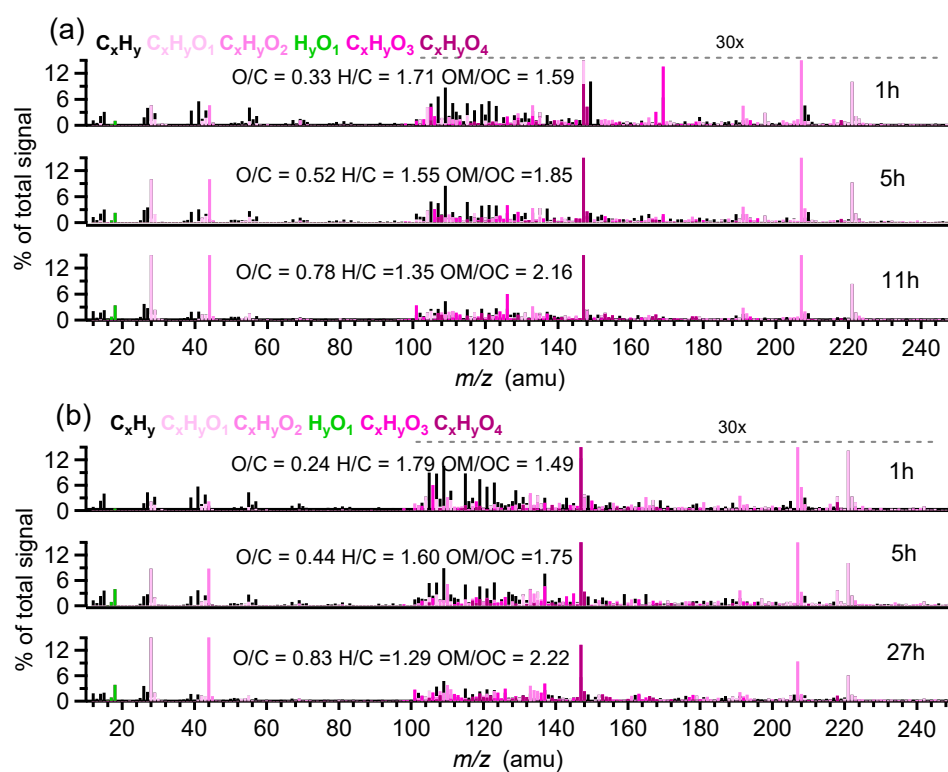

**Figure 2.** Mass spectra of (a) RES+OH and (b) RES+3,4-DMB at different reaction times. The H/C, O/C ratios and OSc values are also shown. The colored sticks represent 6 ion families:  $C_xH_y$ ,  $C_xH_yO_1$ ,  $C_xH_yO_2$ ,  $H_yO_1$ ,  $C_xH_yO_3$  and  $C_xH_yO_4$ . The ion signals at  $m/z > 100$  are amplified 30 times for clarity.

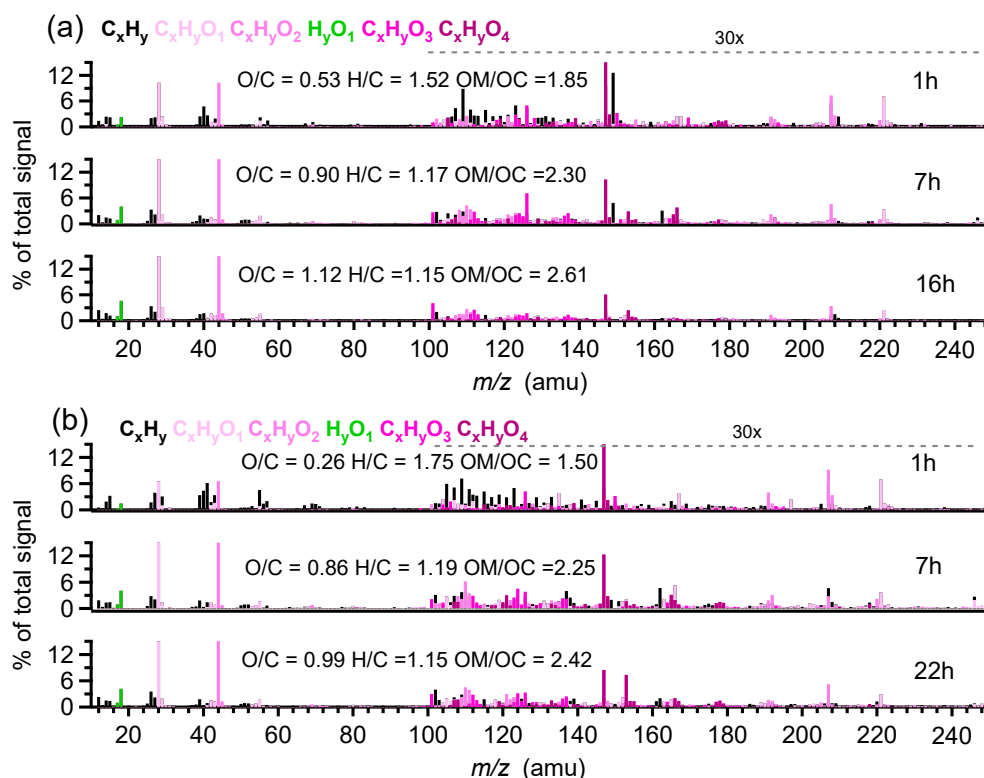

**Figure S3.** Mass spectra of (a) HQ+OH and (b) HQ+3,4-DMB at different reaction times. The H/C, O/C ratios and OSc values are also shown. The colored sticks represent 6 ion families:  $C_xH_y$ ,  $C_xH_yO_1$ ,  $C_xH_yO_2$ ,  $H_yO_1$ ,  $C_xH_yO_3$  and  $C_xH_yO_4$ . The ion signals at  $m/z > 100$  are amplified 30 times for clarity.

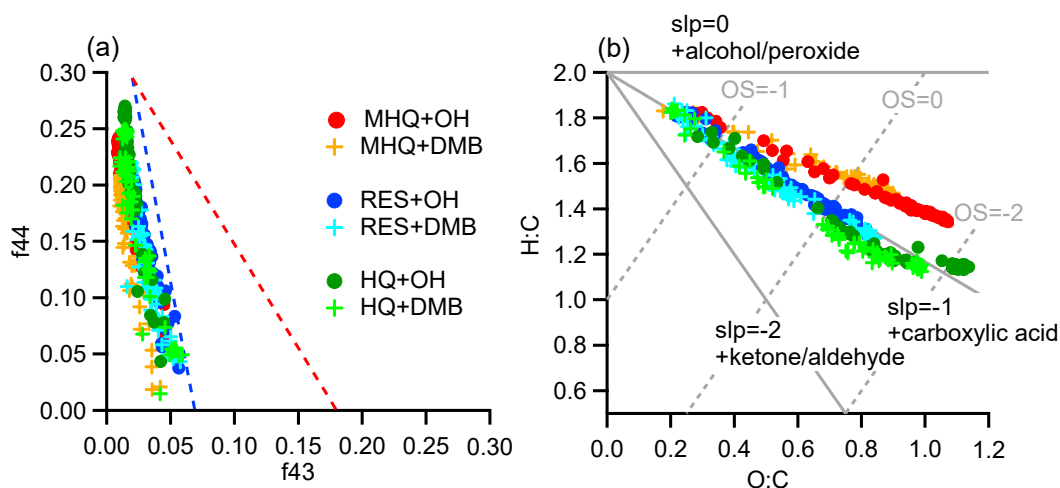

**Figure S4.** Evolution profiles of aqueous-phase SOA: (a)  $f_{44}$  (mass ratio of ion signal at  $m/z$  44 to total organic signal) vs.  $f_{43}$  (mass ratio of ion signal at  $m/z$  43 to total organic signal). (b) Van Krevelen (VK) diagram based on AMS data, in which lines with slopes of 0, -1 and -2 represent the reaction pathways with additions of alcohol/peroxide, carboxylic acid, and ketone/aldehyde functional group, respectively. Dashed lines are OSc values.

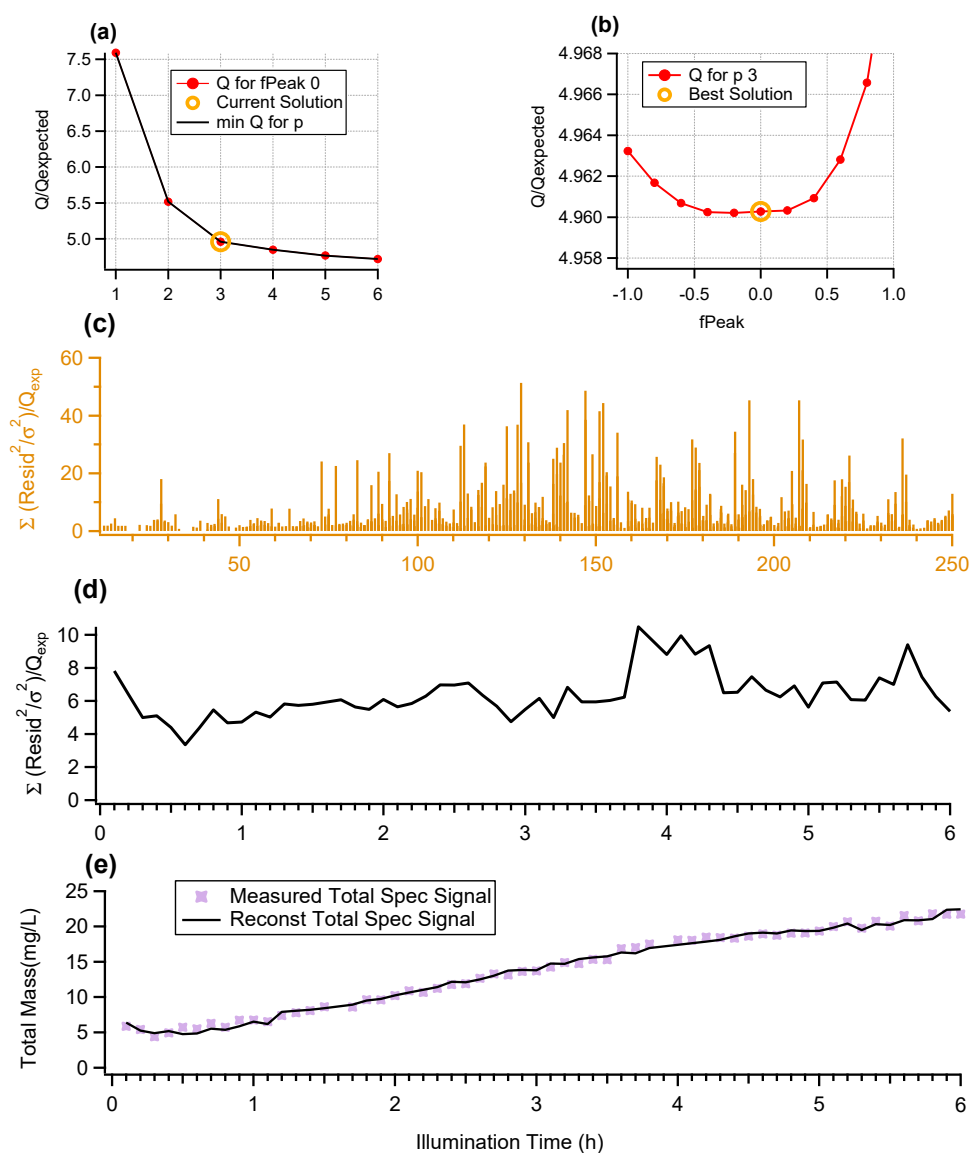

**Figure S5.** Three- factor solution for PMF analysis of OH<sup>-</sup> mediated oxidations of MHQ: (a)  $Q/Q_{\text{exp}}$  as a function of number of factors ( $p$ ) selected for PMF. For the beat solution(3-factor), (b)  $Q/Q_{\text{exp}}$  as a function of  $f_{\text{Peak}}$ , (c) the  $Q/Q_{\text{exp}}$  values for each ion, (d) the  $Q/Q_{\text{exp}}$  for each point in time, (e) time series of the measured and the reconstructed organic mass loading.
